# Supplementary material
Source: PubMed Central journal article supplement (PMC4542046)
Supplement: ismej20159x5.pdf [file ismej20159x5.pdf]

(a)

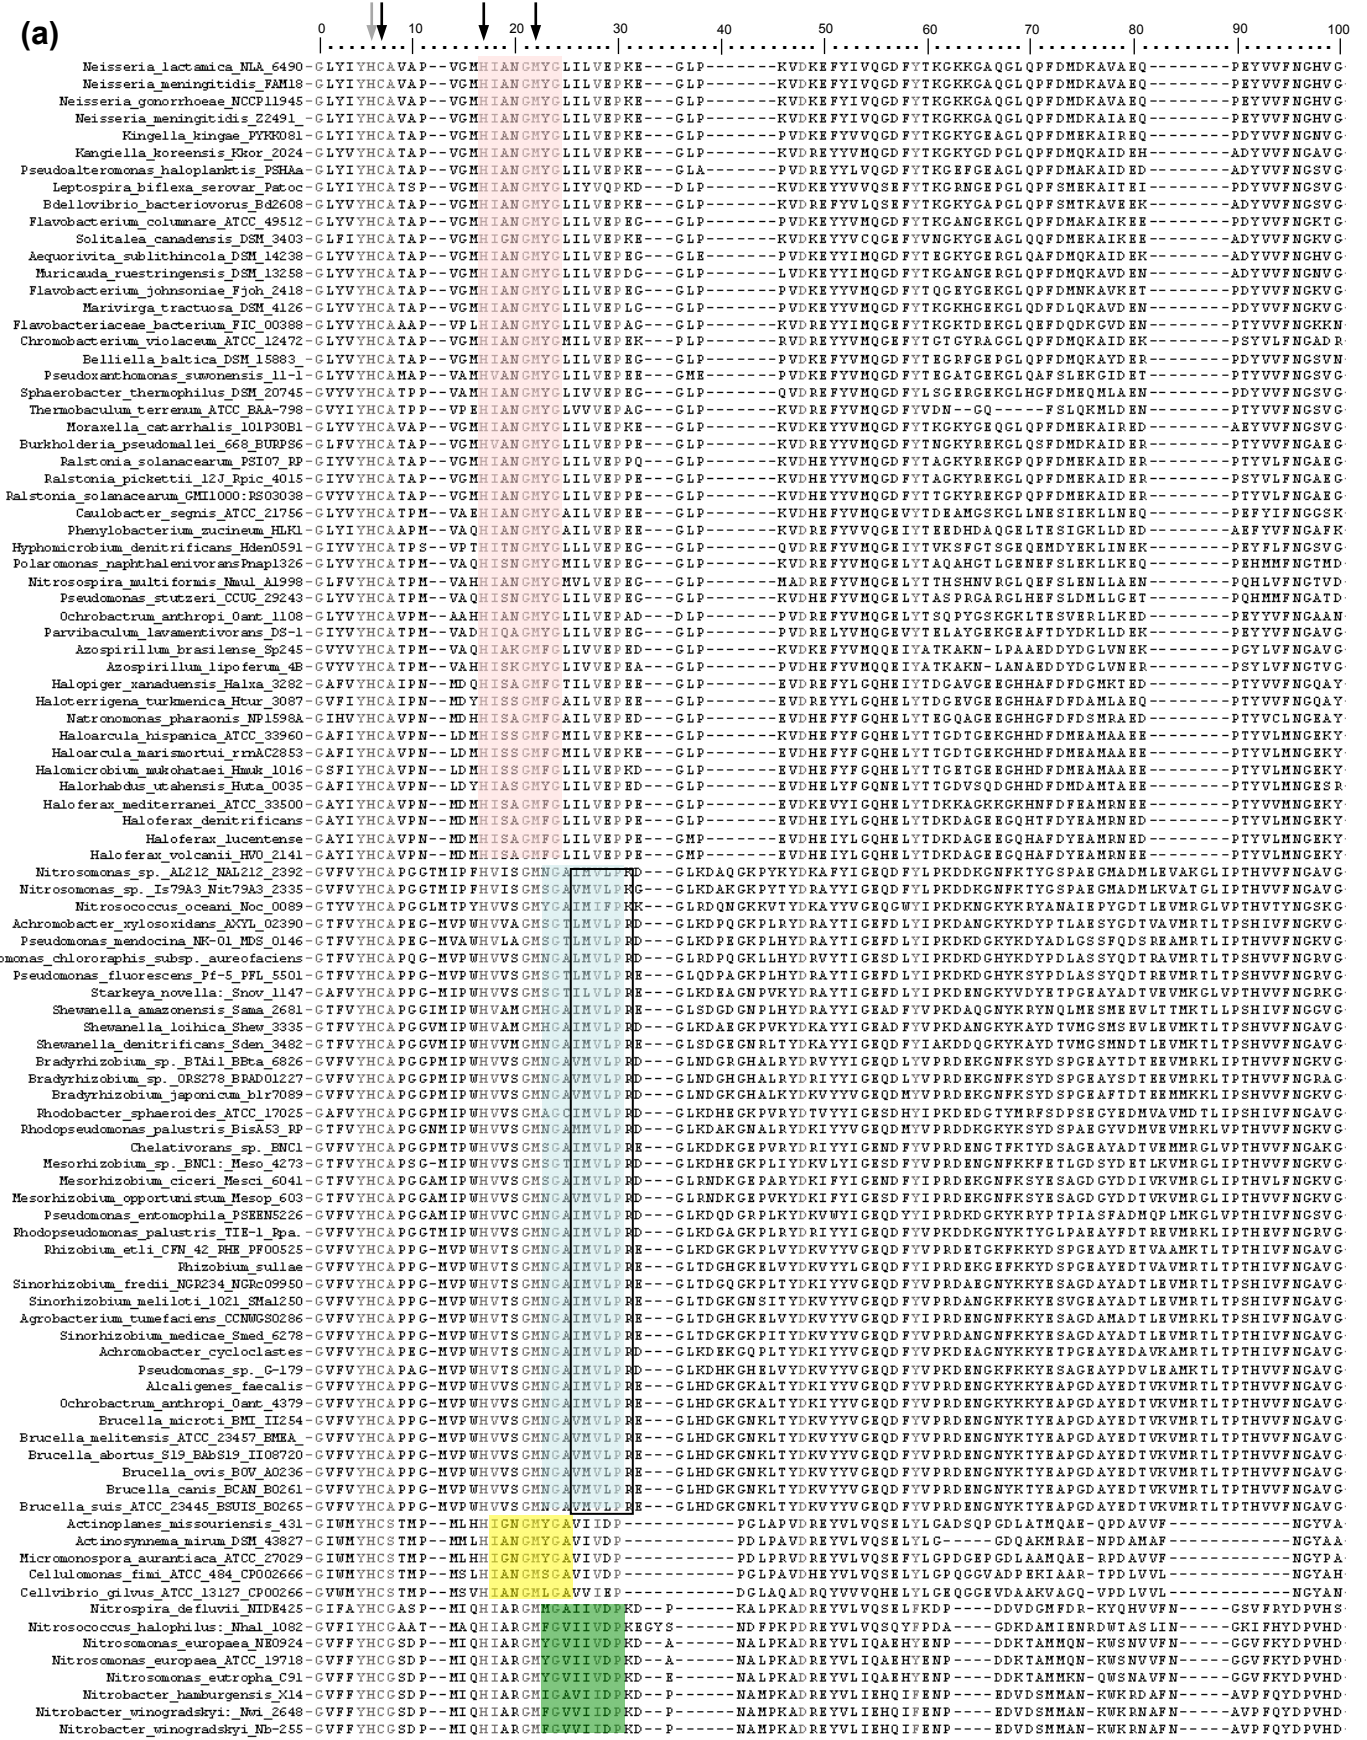

Cluster I Cluster II Cluster III Cluster IV

Figure S1, Wei et al.





(c)

Halomonas\_alimentaria\_FJ686149-EFIVNFKETQKVRLVNYENLDA--LS TVEIDTSRFLHDGG--WDAS---GRYFLTAANESNQIVVIDAQERLEAIVDVG--KIPHPGRG  
Halomonas\_sp\_PBN3-EFIVNFKETQKVRLVNYENLDA--LS TVEIDTSRFLHDGG--WDAS---GRYFLTAANESNQIVVIDAQERLEAIVDVG--KIPHPGRG  
Halomonas\_shengliensis\_FJ686158-EFIVNFKETQKVRLVNYENLDA--LS TVEIDTSRFLHDGG--WDAS---GRYFLTAANESNQIVVIDAQERLEAIVDVG--KIPHPGRG  
Halomonas\_denitrificans\_GQ384047-EFIVNFKETQKVQLVNYENLEA--LS TVEIETSRLFLHDGG--WDAS---GRYFLTAANESNQIVVIDAQERLEAIVDVG--KIPHPGRG  
Halomonas\_fontilapidosi\_FJ686147-EFIVNFKETQKVQLVNYENLDA--LS TVEIETSRLFLHDGG--WDAS---GRYFLTAANESNQIVVIDALERLEAIVDVG--KIPHPGRG  
Halomonas\_cerina\_GQ384052-EFIVNFKETQKVQLVNYEDLDA--LS TVEIDTSRFLHDGG--WDST---GRYFLTAANESNQIVVIDAQERLEAIVDVG--KIPHPGRG  
Halomonas\_nitroreducens\_FJ686148-EFIVNFKETQKVQLVNYEDLDA--LS TVEIDTSRFLHDGG--WDST---GRYFLTAANESNQIVVIDAQERLEAIVDVG--KIPHPGRG  
Kangiella\_koreensis\_DSM\_16069-EFIVNFKETQKIKLVNYSIDIN--LQVTTIDAAPFLHDGG--WDS S---RRYFLTAANENDTIAVVDAEDRELEAIVDVG--KIPHPGRG  
Marinobacter\_aquaeolei\_VT8-EFIVNFKETQKIMLVNYEDMEN--MNITSIDAAYFLHDGG--WDAS---MRYFLTAANNSNKIAVVDAQDRNLEAIVDVG--KIPHPGRG  
Marinobacter\_sp\_ATCC49840-EFIVNFKETQKIMLVNYEDMEN--MNITSIDAARFLHDGG--WDAS---MRYFLTAANNSNKIAVVDAQDRNLEAIVDVG--KIPHPGRG  
Marinobacter\_sp\_C1870-EFIVNFKETQKIMLVNYEDMEN--MNITSIDAARFLHDGG--WDAS---MRYFLTAANNSNKIAVVDAQDRNLEAIVDVG--KIPHPGRG  
Hahella\_chejuensis\_KCTC\_2396-EFIVNFKETQKILLVNYEDINA--LKVTITDAARFLHDGG--WDNT---HRYFLTAANQSNKVAIVDSKDGALVLDVG--AIPHPGRG  
Pseudomonas\_stutzeri\_ATCC\_17588-EFIVNFKETQKVMLVNYEDINN--LTTTMITGAPFLHDGG--WDVS---HRYFMTAANNSNKVAIVDSKERKMAALVLDVG--KIPHPGRG  
Pseudomonas\_stutzeri\_CCUG\_29243-EFIVNFKETQKVLVNYEDINN--LTTTMITGAPFLHDGG--WDVS---HRYFMTAANNSNKVAIVDSKERKMAALVLDVG--KIPHPGRG  
Pseudomonas\_fluorescens\_Q8r1-96-EFIVNFKETQKVMLVNYQDIKN--LTTITSIDAAPFLHDGG--WDS S---HRYFMTAANNSNKVAIVDSKERKLTALVLDVG--KIPHPGRG  
Pseudomonas\_sp\_I-Bh25-14-EFIVNFKETQKILLVNYKMDIN--LTTTINAAAPFLHDGG--WDST---HRYFMTAANNSNKVAIVDSKERKLSALVLDVG--KIPHPGRG  
Pseudomonas\_aeruginosa\_PA7-EFIVNFKETQKVLVNYKIDIN--LTTTSIGAAPFLHDGG--WDS S---HRYFMTAANNSNKVAIVDSKERKMAALVLDVG--KIPHPGRG  
Pseudomonas\_aeruginosa\_PA01-EFIVNFKETQKVLVNYKIDIN--LTTTSIGAAPFLHDGG--WDS S---HRYFMTAANNSNKVAIVDSKDRRLSALVLDVG--KIPHPGRG  
Pseudomonas\_aeruginosa\_LE8B58-EFIVNFKETQKVLVNYKIDIN--LTVTSIGAAPFLHDGG--WDS S---HRYFMTAANNSNKVAIVDSKDRRLSALVLDVG--KIPHPGRG  
Achromobacter\_sp\_DBTN3-EFIVNFKETQKVLVNYKIDIN--LTVTSIGAAPFLHDGG--WDS S---HRYFMTAANNSNKVAIVDSKDRRLSALVLDVG--KIPHPGRG  
Burkholderia\_cepacia\_AB092344-EFIVNFKETQKVLVNYKIDIN--LTVTSIGAAPFLHDGG--WDS S---HRYFMTAANNSNKVAIVDSKDRRLSALVLDVG--KIPHPGRG  
Hiobacillus\_denitrificans\_ATCC\_25259-EFIVNFKETQKVLVNYEDINN--LKMTIEAARFLHDGG--WDST---HRYFMSAANASNKIAVVDAKDRKLAAMVLDVG--KIPHPGRG  
Dechloromonas\_aromatica\_RCB-EFIVNFKETQMVYSVDYRDLNN--LKIKMIEAARFLHDGG--FEST---HRYFMDAANASNKIAVIDTKEGKLEKLVLDVG--KIPHPGRG  
Dechlorosoma\_suilum\_PS-EFIVNFKETQMVYSVDYRDLNN--LKIKMIEAARFLHDGG--FEST---HRYFMDAANASNKIAVIDTKEGKLEKLVLDVG--KIPHPGRG  
Aromatoleum\_aromaticum\_EbN1-EFIVNFKETQKTLMVYSDIQN--LKTEIGSAPFLHDGG--WDAS---KRYFMAAANQSNKVAIVDAKDGKLAGLVLDVG--KIPHPGRG  
Azococcus\_sp\_KH32C-EFIVNFKETQKTLMVYSDIKN--LKMTIEGSAARFLHDGG--WDS S---KRYFLVAANQSNKVAIVDAKDGKLAGLVLDVG--KIPHPGRG  
Rubrivivax\_gelatinosus\_IL144-EFIVNFKETQKTLMVYSDINLA--LKMTIEGSAARFLHDGG--WDAT---KRYFVAANQSNKIAVIDAKEDKLAALVLDVG--KIPHPGRG  
Alicyclophilius\_denitrificans\_R601-EFIVNFKETQKTMVYSDINLA--LKMTIEGSAARFLHDGG--WDS S---KRYFMAAANQSNKVAIVDAKDGKLAGLVLDVG--KIPHPGRG  
Acidovorax\_ebreus\_TPSY-EFIVNFKETQKTMVYSDINLA--LKMTIEGSAARFLHDGG--WDAS---KRYFMAAANQSNKIAVIDAKEDKLAGLVLDVG--KIPHPGRG  
Acidovorax\_sp\_US42-EFIVNFKETQKTMVYSDINLA--LKMTIEGSAARFLHDGG--WDAS---KRYFMAAANQSNKIAVIDAKEDKLAGLVLDVG--KIPHPGRG  
Aquadspirillum\_sp\_DSM\_12823-EFIVNFKETQKVMVYDIDLNN--LKTQIDTAKYLDGG--FDAS---GRYFMTAANASDKIAVVDTKESKLEAIVDVG--KIPHPGRG  
Comamonas\_denitrificans\_DQ865926-EFIVNFKETQKVMVYDIDLNN--LKTQIDTAKYLDGG--FDAS---GRYFMTAANASDKIAVVDTKESKLEAIVDVG--KIPHPGRG  
Comamonas\_nitratorans\_FN55565-EFIVNFKETQKVMVYDIDLNN--LKTQIDTAKYLDGG--FDAS---GRYFLTAANASDKIAVVDTKESKLEAIVDVG--KIPHPGRG  
Brachymonas\_denitrificans\_ABI96831-EFIVNFKETQKIMVYDIDLNN--LKTTLDSAKFLHDGG--FDS T---GRYFMTAANASNKIAVVDTKEDKLAALVLDVG--KIPHPGRG  
Brachymonas\_denitrificans\_CB992409-EFIVNFKETQKIMVYDIDLNN--LKTTLDSAKFLHDGG--FDS T---GRYFMTAANASNKIAVVDTKEDKLAALVLDVG--KIPHPGRG  
Sideroxydans\_lithotrophicus\_LMG\_19424-EFIVNFKETQKIMVYSDLTN--LKMTVIDAARFLHDGG--FDS T---GRYFMAAANASNKIAVVDTKEDKLAAMVLDVG--KIPHPGRG  
Pseudogulbenkiana\_sp\_NHB8-EFIVNFKETQKIMVYSDLTN--LKTTLINAAARFLHDGG--FDR T---GRYFVAANASNKIAVVDTKEDKLAGLVLDVG--KIPHPGRG  
Herbaspirillum\_sp\_I-Bh15-17-EFIVNFKETQKIMVYQDLKN--LKTTLIDAAARFLHDGG--FDS T---GRYFMAAANASNKIAVVDTKEDKLAALVLDVG--KIPHPGRG  
Cupriavidus\_metallicurans\_CH34-EFIVNFKETQKILMVYSDIKN--LKTTLIDAAARFLHDGG--FDS T---GRYFLVAANASNKIAVVDTKEDKLAALVLDVG--KIPHPGRG  
Cupriavidus\_necator\_location\_1\_778-EFIVNFKETQKILMVYSDIKN--LKTTLIDAAARFLHDGG--FDS T---GRYFLVAANASDKIAVVDTKEDKLAALVLDVG--KIPHPGRG  
Burkholderiaceae\_bacterium\_N2-EFIVNFKETQKILMVYADLNN--LKTTLIDAAARFLHDGG--FDAT---GRYFLVAANASNKIAVVDTKEDKLAALVLDVG--KIPHPGRG  
Cupriavidus\_sp\_M24-EFIVNFKETQKIMMVYADLNN--LKTTLIDAAARFLHDGG--FDAT---GRYFLVAANASNKIAVVDTKEDKLAALVLDVG--KIPHPGRG  
Ralstonia\_eutropha\_JMP134-EFIVNFKETQKIMMVYADLNN--LKTTLIDAAARFLHDGG--FDAT---GRYFLVAANASNKIAVVDTKEDKLAALVLDVG--KIPHPGRG  
Cupriavidus\_taiwanensis\_LMG\_19424-EFIVNFKETQKILMVYSDLAN--LKTTLIDAAARFLHDGG--FDS T---GRYFLVAANASDKIAVVDTKEDKLAALVLDVG--KIPHPGRG  
Ralstonia\_pickettii\_DTP0602-EFIVNFKETQKILMVYSDLAN--LKTTLIDAAARFLHDGG--FDS T---GRYFLVAANASDKIAVVDTKEDKLAALVLDVG--KIPHPGRG  
Cupriavidus\_necator\_N\_1-EFIVNFKETQKILMVYSDLAN--LKTTLIDAAARFLHDGG--FDAT---GRYFLVAANASDKIAVVDTKENKLAALVLDVG--KIPHPGRG  
Ralstonia\_eutropha\_H16-EFIVNFKETQKILMVYSDLAN--LKTTLIDAAARFLHDGG--FDAT---GRYFLVAANASDKIAVVDTKENKLAALVLDVG--KIPHPGRG  
Accumulibacter\_phosphatis\_UW-1-EFIVNFKETQMIRLVYSDLAN--LKTTLIDAAARFLHDGG--WDS S---KRYFLVAANASNKIAVVDTKEDKLAALVLDVG--KIPHPGRG  
Dechlorospirillum\_sp\_I-Bh37-22-EFIVNFKETQKILVYSDIKN--LKTTLIDAAARFLHDGG--WDS T---KRYFLVAANASNKIAVVDTKEDKLAALVLDVG--KIPHPGRG  
Thaueria\_sp\_M21T-EFIVNFKETQKILLVYSDIKN--LKSIAEAEARFLHDGG--WDS S---KRYFMAAANQSNKVAIVDAKEDKLAGLVLDVG--KIPHPGRG  
Pseudomonas\_stutzeri\_DSM\_10701-EFIVNFKETQKIMLVYDIDLNN--LKTTLIDAAARFLHDGG--WDS S---HRYFMAAANQSNKVAIVDAKEDKLAGLVLDVG--KIPHPGRG  
Bordetella\_petrii\_AM902716-EFIVNFKETQKILLVYDIDLNN--LKTTLIDAAARFLHDGG--WDS S---GRYFMAAANQSNKVAIVDAKEDKLAGLVLDVG--KIPHPGRG  
Comamonadaceae\_bacterium\_I-Bh25-7-EFIVNFKETQKILLVYSDIKN--LKTTLIDAAARFLHDGG--WDS S---KRYFLVAANASNKIAVVDTKEDKLAALVLDVG--KIPHPGRG  
Magnetospirillum\_magneticum\_AMB-1-EFIVNFKETQLLLVYSDIKN--LKVTSIEAERFLHDGG--FDAS---KRYFLVAANASNKIAVVDTKEDKLVGMVLDVG--AIPHPGRG  
Rhodanobacter\_sp\_D206a-EFIVNFKETQKILLVYDIDLNN--LKTVEIAERFLHDGG--FDT---GRYFLVAANASNKIAVVDTKEDKLVGMVLDVG--AIPHPGRG  
occus\_pantotrophus\_location\_1\_1791-EFIVNFKETQKILLVYDIDLNN--LKTVEIAERFLHDGG--LDGS---HRYFITAANARNKLVVDTKEDKLVAVLDVG--KIPHPGRG  
Paracoccus\_sp\_62-EFIVNFKETQKILLVYDIDLNN--LKTVEIAERFLHDGG--LDGS---HRYFITAANARNKLVVDTKEDKLVAVLDVG--KIPHPGRG  
Paracoccus\_sp\_I-Bh37-1-EFIVNFKETQKILLVYDIDLNN--LKTVEIAERFLHDGG--LDGS---HRYFITAANARNKLVVDTKEDKLVAVLDVG--KIPHPGRG  
Polymorphum\_gilvum\_S1003B-26A1-EFIVNFKETQKILLVYSDIKN--LKTVEIAERFLHDGG--LDST---HRYFLVAANARNKIAVVDTKEDKLVAVLDVG--KIPHPGRG  
Labrenzia\_sp\_C1B10-EFIVNFKETQKILLVYSDIKN--LKTVEIAERFLHDGG--FDS T---KRYFLVAANARGKVAIVDTKEDKLVAVLDVG--KIPHPGRG  
Stappia\_aggregata\_IAM\_12614-EFIVNFKETQKILLVYSDIKN--LKTVEIAERFLHDGG--FDS T---KRYFLVAANARGKVAIVDTKEDKLVAVLDVG--KIPHPGRG  
Ruegeria\_pomeroyi\_DSS-3-EFIVNFKETQKILMIDYSDIKN--LKVTEIEAERFLHDGG--FDS S---KRYFLVAANARGKVAIVDTKEDKLVAVLDVG--KIPHPGRG  
Dinoroseobacter\_shibae\_DFL\_12-EFIVNFKETQKILLVYSDIKN--LKVTEIEAERFLHDGG--LDST---KRYFLTAANARNKIAVVDTKEDKLVAVLDVG--KIPHPGRG  
Roseobacter\_denitrificans\_Och\_114-EFIVNFKETQKIMMVYSDIDA--LKITEINAEARFLHDGG--LDST---QRYFLTAANARGKVAIVDTKEDKLVAVLDVG--KIPHPGRG  
Roseobacter\_litoralis\_Och\_149-EFIVNFKETQKIMMVYSDMDA--LKITEINAEARFLHDGG--LDST---QRYFLTAANARGKVAIVDTKEDKLVAVLDVG--KIPHPGRG  
Rhodothermus\_marinus\_DSM\_4252-EFIVNFKETQKILLVYSDIKN--LKTVEIAERFLHDGG--WDHT---KRYFLVAANNSNKVAIVDTKEDKLVAVLDVG--KIPHPGRG  
Methylomirabilis\_oxifera\_FT565575-EFIVNFKETQLLWVYSDIKN--LKTMTQIGERFLHDGG--WDS T---KRYFMAAANMANKVAIVDTKEDKLVAVLDVG--KIPHPGRG  
Kuenenia\_stuttgartiensis\_CTS73071-EFIVNFKETQLLLVYSDIKN--LKVTTIESERFLHDGG--WDS S---HRYFLVAANNSNKVAIVDTKEDKLVAVLDVG--KIPHPGRG  
Nitratiruptor\_sp\_SB155-2-EFIVNFKETQKILLVYSDIKN--LKTVEIAERFLHDGG--WDLT---KRYFLVAANARNKVAIVDTKEDKLVAVLDVG--KIPHPGRG  
Methylomonas\_methanica\_MC09-IFAIALENAGQVWIVDYKEDGFP-VT-KIEKVGRLHDAF--LTHG---GKLMVAS YDSS IVAAIDLKRLIKLQLPAG--CVPHVGGG  
Methylomonas\_sp\_16a\_GQ241349-VFAIALENAGQVWIVDYKEDGFP-VT-KIEKVGRLHDAF--LTHG---GKLMVAS YDSS IVAAIDLKRLIKLQLPAG--CVPHVGGG  
Methylobacter\_tundripaludum\_SV96-IFAIALENAGQVWVVDLK-EGFP-VT-KIENVGRHLHDAF--LSHG---GKLMVAS YDSS IVTAIDLKRIKLEAG--CVPHVGGG  
Methylomicrobium\_album\_BG8-VLVVALENAGQVWVVDLK-DDFP-VT-KIENVGRHLHDAF--LTHN---GKLMVAS YDSS IVTAIDLKRIKLEAG--CVPHVGGG  
Nitratifactor\_salsuginis\_DSM\_16511-YFSAALKDGGHVYIVDYKEDGFP-VG-IDGIPNIGILHDAF--ENEGVDEGFRVYVAS QGSDLMGVVDLKTCKLAAKLYTGPGRKPHGQG  
Sulfurovum\_sp\_NBC37-1-YFSAALKDAGHVYIVDYKEDGFP-IVGDIPNIGILHDAF-ENEGVDEGFRVYVAS QGSDLMGVVDLKTCKLAAKLYTGPGRKPHGQG  
Sulfurimonas\_autotrophica\_DSM\_16294-YIAPALKDAGHVYIVDYKEDGFP-IVGDIPNIGILHDAF-ENEGVDEGFRVYVAS QGSDLMGVVDLKTCKLAAKLYTGPGRKPHGQG  
Sulfurimonas\_denitrificans\_DSM\_1251-YFSAALKDGGHVYIVDYKEDGFP-IVGDIPNIGILHDAF-LNEGKEIGRYLF IAS QGSDVGVVDLKTCKLAAKLYTGPGRKPHGQG  
Sulfurimonas\_gotlandica\_GD1-YIAPALKDGGHVYIVDYKEDGFP-IVGDIPNIGILHDAF-LNEGKEIGRYLF IAS QGSDVGVVDLKTCKLAAKLYTGPGRKPHGQG

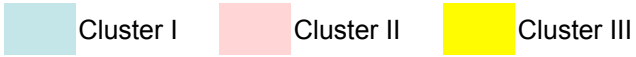

Figure S1, Wei et al.



(d)

Halomonas\_alimentaria\_FJ686149--ANFVDPFHGPPVWATSHLGDATIQIGTDP----EGHPDPAWQVVR--TLEGQGGGSLFIKTHPESDNLVVD  
Halomonas\_sp\_PBN3--ANFVDPFHGPPVWATSHLGDATIQIGTDP----EGHPDPAWQVVR--TLEGQGGGSLFIKTHPESDNLVVD  
Halomonas\_shengliensis\_FJ686158--ANFVDPFHGPPVWATSHLGDATIQIGTDP----EGHPDPAWQVVR--TLEGQGGGSLFIKTHPESDNLVVD  
Halomonas\_denitrificans\_GQ384047--ANFVDPFHGPPVWATSHLGDATIQIGTDP----EGHPDPAWQVVR--TLEGQGGGSLFIKTHPESDNLVVD  
Halomonas\_fontilapidosi\_FJ686147--ANFVDAEHGPPVWATSHLGDNTISLIGTDP----EGHPDPAWQVVR--TLEGQGGGSLFIKTHPESDNLVVD  
Halomonas\_cerina\_GQ384052--ANFVDPFHGPPVWATSHLGDATVQLIGTDP----EGHPDPAWQVVR--TLEGQGGGSLFIKTHPESDNLVVD  
Halomonas\_nitroreducens\_FJ686148--ANFVDPFHGPPVWATSHLGDNTIQIGTDP----EGHPDPAWQVVR--TLEGQGGGSLFIKTHPESDNLVVD  
Kangiella\_koreensis\_DSM\_16069--ANFIDPDNGPPVWATSLGNANITLIGTDP----EKHKDPAWQVVR--TLEGQGGGSLFIKTHPESDNLVVD  
Marinobacter\_aquaeolei\_VT8--ANFVDPFHGPPVWATSHLGDQTIQIGTDP----EGHPDPAWQVVR--TVDGQGGGSLFIKTHPESDNLVVD  
Marinobacter\_sp\_ATCC49840--ANFVDPFHGPPVWATSHLGDQTIQIGTDP----EGHPDPAWQVVR--TVDGQGGGSLFIKTHPESDNLVVD  
Marinobacter\_sp\_C1870--ANFVDPFHGPPVWATSHLGDQTIQIGTDP----EGHPDPAWQVVR--TVDGQGGGSLFIKTHPESDNLVVD  
Hahella\_chejuensis\_KCTC\_2396--ANFTDAKYGPPVWATSHLGDGSIQIGTDP----DKHGDYAWKQVVR--SLNAQGGGSLFIKTHPESDNLVVD  
Pseudomonas\_stutzeri\_ATCC\_17588--ANFVHPKFGPPVWATSHLGDQTIQIGTDP----DKHPKNAWQVVR--TLEGQGGGSLFIKTHPESDNLVVD  
Pseudomonas\_stutzeri\_CCUG\_29243--ANFVHPKFGPPVWATSHLGDQTIQIGTDP----DKHPKNAWQVVR--TLEGQGGGSLFIKTHPESDNLVVD  
Pseudomonas\_fluorescens\_Q8r1-96--ANFNHPLYGPPVWATSHLGDAGVSLIGTDP----VNHPPQYAWKQVVR--TLEGQGGGSLFIKTHPESDNLVVD  
Pseudomonas\_sp\_I-Bh25-14--ANFNHPLYGPPVWATSHLGDQTIQIGTDP----KHPQYAWKQVVR--TLEGQGGGSLFIKTHPESDNLVVD  
Pseudomonas\_aeruginosa\_PA7--ANFVHPKFGPPVWATSHLGDGSIQIGTDP----KHPQYAWKQVVR--ELQGGGSLFIKTHPESDNLVVD  
Pseudomonas\_aeruginosa\_PA01--ANFVHPKFGPPVWATSHLGDGSIQIGTDP----KHPQYAWKQVVR--ELQGGGSLFIKTHPESDNLVVD  
Pseudomonas\_aeruginosa\_LES858--ANFVHPKFGPPVWATSHLGDGSIQIGTDP----KHPQYAWKQVVR--ELQGGGSLFIKTHPESDNLVVD  
Achromobacter\_sp\_DBN3--ANFVHPKFGPPVWATSHLGDGSIQIGTDP----KHPQYAWKQVVR--ELQGGGSLFIKTHPESDNLVVD  
Burkholderia\_cepacia\_AB092344--ANFVHPKFGPPVWATSHLGDGSIQIGTDP----KHPQYAWKQVVR--ELQGGGSLFIKTHPESDNLVVD  
Thiobacillus\_denitrificans\_ATCC\_25259--ANFVDPKFGPPVWATSHLGDGSIQIGTDP----VKHKAQAWKQVVR--TLEGQGGGSLFIKTHPESDNLVVD  
Dechloromonas\_aromatica\_RCB--ANFIDPKFGPPVWATSHLGDGSIQIGTDP----KHPDPAWQVVR--TLEGQGGGSLFIKTHPESDNLVVD  
Dechlorosoma\_suillum\_PS--ANFVDPKFGPPVWATSHLGDGSIQIGTDP----VKHGDPAWQVVR--TLEGQGGGSLFIKTHPESDNLVVD  
Aromatoleum\_aromaticum\_EbN1--ANFTHPKYGPVWATSHLGDQTIQIGTDP----VKHKQYAWKQVVR--TLKSQGGGSLFIKTHPESDNLVVD  
Azoarcus\_sp\_KH32C--ANFVHPKFGPPVWATSHLGDGSIQIGTDP----EKHKQYAWKQVVR--TLKSQGGGSLFIKTHPESDNLVVD  
Rubrivivax\_gelatinosus\_IL144--ANFVHPKFGPPVWATSHLGDQTIQIGTDP----VKHKQYAFKQVVR--KLTGGGSLFIKTHPESDNLVVD  
Alicyclophillus\_denitrificans\_K601--ANFTHPKYGPVWATSHLGDQTIQIGTDP----KKNKQYAFKQVVR--KLTGGGSLFIKTHPESDNLVVD  
Acidovorax\_ebreus\_TPSY--ANFTHPKYGPVWATSHLGDQTIQIGTDP----KKNKQYAFKQVVR--KLTGGGSLFIKTHPESDNLVVD  
Acidovorax\_sp\_J842--ANFTHPKYGPVWATSHLGDQTIQIGTDP----KKNKQYAFKQVVR--KLTGGGSLFIKTHPESDNLVVD  
Aquaspirillum\_sp\_DSM\_12823--ANFKHPKFGPPVWATSHLGDGSIQIGTDP----KKNKDHAWKQVVR--TLEGQGGGSLFIKTHPESDNLVVD  
Comamonas\_denitrificans\_DQ865926--ANFKHPKFGPPVWATSHLGDGSIQIGTDP----KKNKDHAWKQVVR--TLEGQGGGSLFIKTHPESDNLVVD  
Comamonas\_nitratorans\_FN555565--ANFKHPKFGPPVWATSHLGDGSIQIGTDP----KKNKDHAWKQVVR--TLEGQGGGSLFIKTHPESDNLVVD  
Brachymonas\_denitrificans\_AB196831--ANFVHPKFGPPVWATSHLGDGSIQIGTDP----VKHKAQAWKQVVR--TLEGQGGGSLFIKTHPESDNLVVD  
Brachymonas\_denitrificans\_CBG92409--ANFVHPKFGPPVWATSHLGDGSIQIGTDP----VKHKAQAWKQVVR--TLEGQGGGSLFIKTHPESDNLVVD  
Sideroxydans\_lithotrophicus\_ES-1--ANFIDPKFGPPVWATSHLGDGSIQIGTDP----VKHKQNAWQVVR--TITGGGSLFIKTHPESDNLVVD  
Pseudogulbenkiania\_sp\_NH88--ANFVHPKFGPPVWATSHLGDGSIQIGTDP----VKHKQYAWKQVVR--SIQGGGSLFIKTHPESDNLVVD  
Herbaspirillum\_sp\_I-Bh15-17--ANFMHPKFGPPVWATSHLGDGSIQIGTDP----VKHKAQAWKQVVR--TITGGGSLFIKTHPESDNLVVD  
Cupriavidus\_metallidurans\_CH34--ANFVHPKFGPPVWATSHLGDQTIQIGTDP----INHKAQAWKQVVR--TLEGQGGGSLFIKTHPESDNLVVD  
Cupriavidus\_necator\_location\_1.778--ANFVHPKFGPPVWATSHLGDQTIQIGTDP----INHKAQAWKQVVR--TLEGQGGGSLFIKTHPESDNLVVD  
Burkholderiaceae\_bacterium\_N52--ANFVHPKFGPPVWATSHLGDQTIQIGTDP----VAHKAQAWKQVVR--TLEGQGGGSLFIKTHPESDNLVVD  
Cupriavidus\_sp\_N24--ANFAHPKFGPPVWATSHLGDQTIQIGTDP----VGHKAQAWKQVVR--TVKGGGSLFIKTHPESDNLVVD  
Ralstonia\_eutropha\_JMP134--ANFVHPKFGPPVWATSHLGDQTIQIGTDP----VGHKAQAWKQVVR--TVKGGGSLFIKTHPESDNLVVD  
Cupriavidus\_taiwanensis\_LMG\_19424--ANFTHPQFGPPVWATSHLGDQTIQIGTDP----AGHPAQAWKQVVR--TVKGGGSLFIKTHPESDNLVVD  
Ralstonia\_pickettii\_DTP0602--ANFTHPQFGPPVWATSHLGDQTIQIGTDP----AGHPAQAWKQVVR--TVKGGGSLFIKTHPESDNLVVD  
Cupriavidus\_necator\_N-1--ANFTHPQFGPPVWATSHLGDQTIQIGTDP----VGHKAQAWKQVVR--TVKGGGSLFIKTHPESDNLVVD  
Ralstonia\_eutropha\_H16--ANFMHPKFGPPVWATSHLGDQTIQIGTDP----AGHPAQAWKQVVR--TVKGGGSLFIKTHPESDNLVVD  
Accumulibacter\_phosphatis\_UW-1--ANFKHPKFGPPVWATSHLGDQTIQIGTDP----AGNPPQAWKQVVR--ELKNGGSLFIKTHPESDNLVVD  
Dechlorospirillum\_sp\_I-Bh37-22--ANFTHPQFGPPVWATSHLGDQTIQIGTDP----EKHPQYAWKQVVR--ELKNGGSLFIKTHPESDNLVVD  
Thaueria\_sp\_M21T--ANFVHPKFGPPVWATSHLGDQTIQIGTDP----QKMPGAGNLFVKTHPESDNLVVD  
Pseudomonas\_stutzeri\_DSM\_10701--ANFVHPQFGPPVWATSHLGDQTIQIGTDP----ELKMPGAGNLFVKTHPESDNLVVD  
Bordetella\_petrii\_AM902716--ANFVHPKFGPPVWATSHLGDQTIQIGTDP----ELKMPGAGNLFVKTHPESDNLVVD  
Comamonadaceae\_bacterium\_I-Bh25-7--ANFVHPKFGPPVWATSHLGDQTIQIGTDP----EIKKHV-PGNLFVKTHPESDNLVVD  
Magnetospirillum\_magneticum\_AMB-1--TNFVHPKFGPPVWATSHLGDQTIQIGTDP----KHPKQAWKQVVR--SLTGGGSLFIKTHPESDNLVVD  
Rhodanobacter\_sp\_D206a--ANFTHPQFGPPVWATSHLGDQTIQIGTDP----EKKNQNAWQVVR--KVNQGGGSLFIKTHPESDNLVVD  
occus\_pantotrophus\_location\_1.1791--ANFVHPKFGPPVWATSHLGDQTIQIGTDP----EGHPDPAWQVVR--SFPALGGGSLFIKTHPESDNLVVD  
Paracoccus\_sp\_62--ANFVHPKFGPPVWATSHLGDQTIQIGTDP----EGHPDPAWQVVR--SFPALGGGSLFIKTHPESDNLVVD  
Paracoccus\_denitrificans\_PD1222--ANFVHPKFGPPVWATSHLGDQTIQIGTDP----EGHPDPAWQVVR--SFPALGGGSLFIKTHPESDNLVVD  
Paracoccus\_sp\_I-Bh37-1--ANFVHPKFGPPVWATSHLGDQTIQIGTDP----EGHPDPAWQVVR--SFPALGGGSLFIKTHPESDNLVVD  
Polymorphum\_gilvum\_SL0038-26A1--ANFTHPQFGPPVWATSHLGDQTIQIGTDP----EGHPDPAWQVVR--SFPALGGGSLFIKTHPESDNLVVD  
Labrenzia\_sp\_C1B10--ANLHPKFGPPVWATSHLGDQTIQIGTDP----EGHPDPAWQVVR--TLYGLGGGSLFIKTHPESDNLVVD  
Stappia\_aggregata\_IAM\_12614--ANLHPKFGPPVWATSHLGDQTIQIGTDP----EGHPDPAWQVVR--TLYGLGGGSLFIKTHPESDNLVVD  
Ruegeria\_pomeroyi\_D88-3--ANLHPKFGPPVWATSHLGDQTIQIGTDP----EGHPDPAWQVVR--TLYGLGGGSLFIKTHPESDNLVVD  
Dinoroseobacter\_shibae\_DFL\_12--ANLHPKFGPPVWATSHLGDQTIQIGTDP----EGHPDPAWQVVR--QLYAMGGGSLFIKTHPESDNLVVD  
Roseobacter\_denitrificans\_Och\_114--ANLHPKFGPPVWATSHLGDQTIQIGTDP----EGHPDPAWQVVR--QLYAMGGGSLFIKTHPESDNLVVD  
Roseobacter\_litoralis\_Och\_149--ANLHPKFGPPVWATSHLGDQTIQIGTDP----EGHPDPAWQVVR--QLYAMGGGSLFIKTHPESDNLVVD  
Rhodothermus\_marinus\_DSM\_4252--ANFYNPYGHVWATSHLGDQTIQIGTDP----GPNQMKVVKLELPGVGGGSLFIKTHPESDNLVVD  
Methylomirabilis\_oxifera\_FP565575--ANWIDPKFGPPVWATSHLGDQTIQIGTDP----AKHK-ESAWKQVVR--DLKTLGGGSLFIKTHPESDNLVVD  
Kuenenia\_stuttgartiensis\_CT573071--TNFKDPEYGVWYATPHLGEAAVLCVTKP----RHDKTENRWKQVVR--KLVAGDGGSLFIKTHPESDNLVVD  
Nitratiruptor\_sp\_SB155-2--ANVSHPKYGIWCTGHIIGSDVVCIGTDP----TYHPQYAWRVVADIKLPGNGGSLFIKTHPESDNLVVD  
Methylomonas\_methanica\_MC09--SAVKVDGRTLFGFTNFGDCDKMVSVWDL-----DKMEVVKQ--VPVSGGTESPAAHANAPYVAVDII  
Methylomonas\_sp\_16a\_GQ241349--AAVVVDGRTLFGFTNFGDCDKMVSVWDL-----DKMEVVKQ--VPVSGGTESPAAHANAPYVAVDII  
Methylobacter\_tundripaludum\_SV96--SVVEVDGRTLFGFTNFGDCDKMVSVWDL-----DKMEVVKQ--VPVSGGTESPAAHANAPYVAVDII  
Methylomicrobium\_album\_BG8--AAVQVDGRTLFGFTNFGDCDKMVSVWDL-----DKMEVVKQ--VPVSGGTESPAAHANAPYVAVDII  
Nitratiraptor\_salsuginis\_DSM\_16511--SSWYNDKYG-QLNATN-SMNVGDVVIWNNM-----DN-KVVAN--VPTAGGGLFVGTGSEHTPFIWSD  
Sulfurovum\_sp\_NBC37-1--SSWFNKKMGKQLNATN-SMNVGDVVIWNNM-----PSWKIVK--IKTSGGGLFVGTGSEHTPFIWSD  
Sulfurimonas\_autotrophica\_DSM\_16294--SSWYNDRYG-QLYATN-SMNVGDVVIWNNM-----SNWDDVAH--VRTAGGGLFVGTGSEHTPFIWSD  
Sulfurimonas\_denitrificans\_DSM\_1251--SSWYNETLGGQLGATV-NMNLGQVTIWD-----DHFVDVIRQ--IPTGGGGLFVGTGSEHTPFIWSD  
Sulfurimonas\_gotlandica\_GD1--SSWYNEQLGGQLGATV-NMNLGQVTIWD-----DNFVDVIRQ--IPIGGGGLFVGTGSEHTPFIWSD

Cluster I Cluster II Cluster III

Figure S1 Wei et al.

(a)

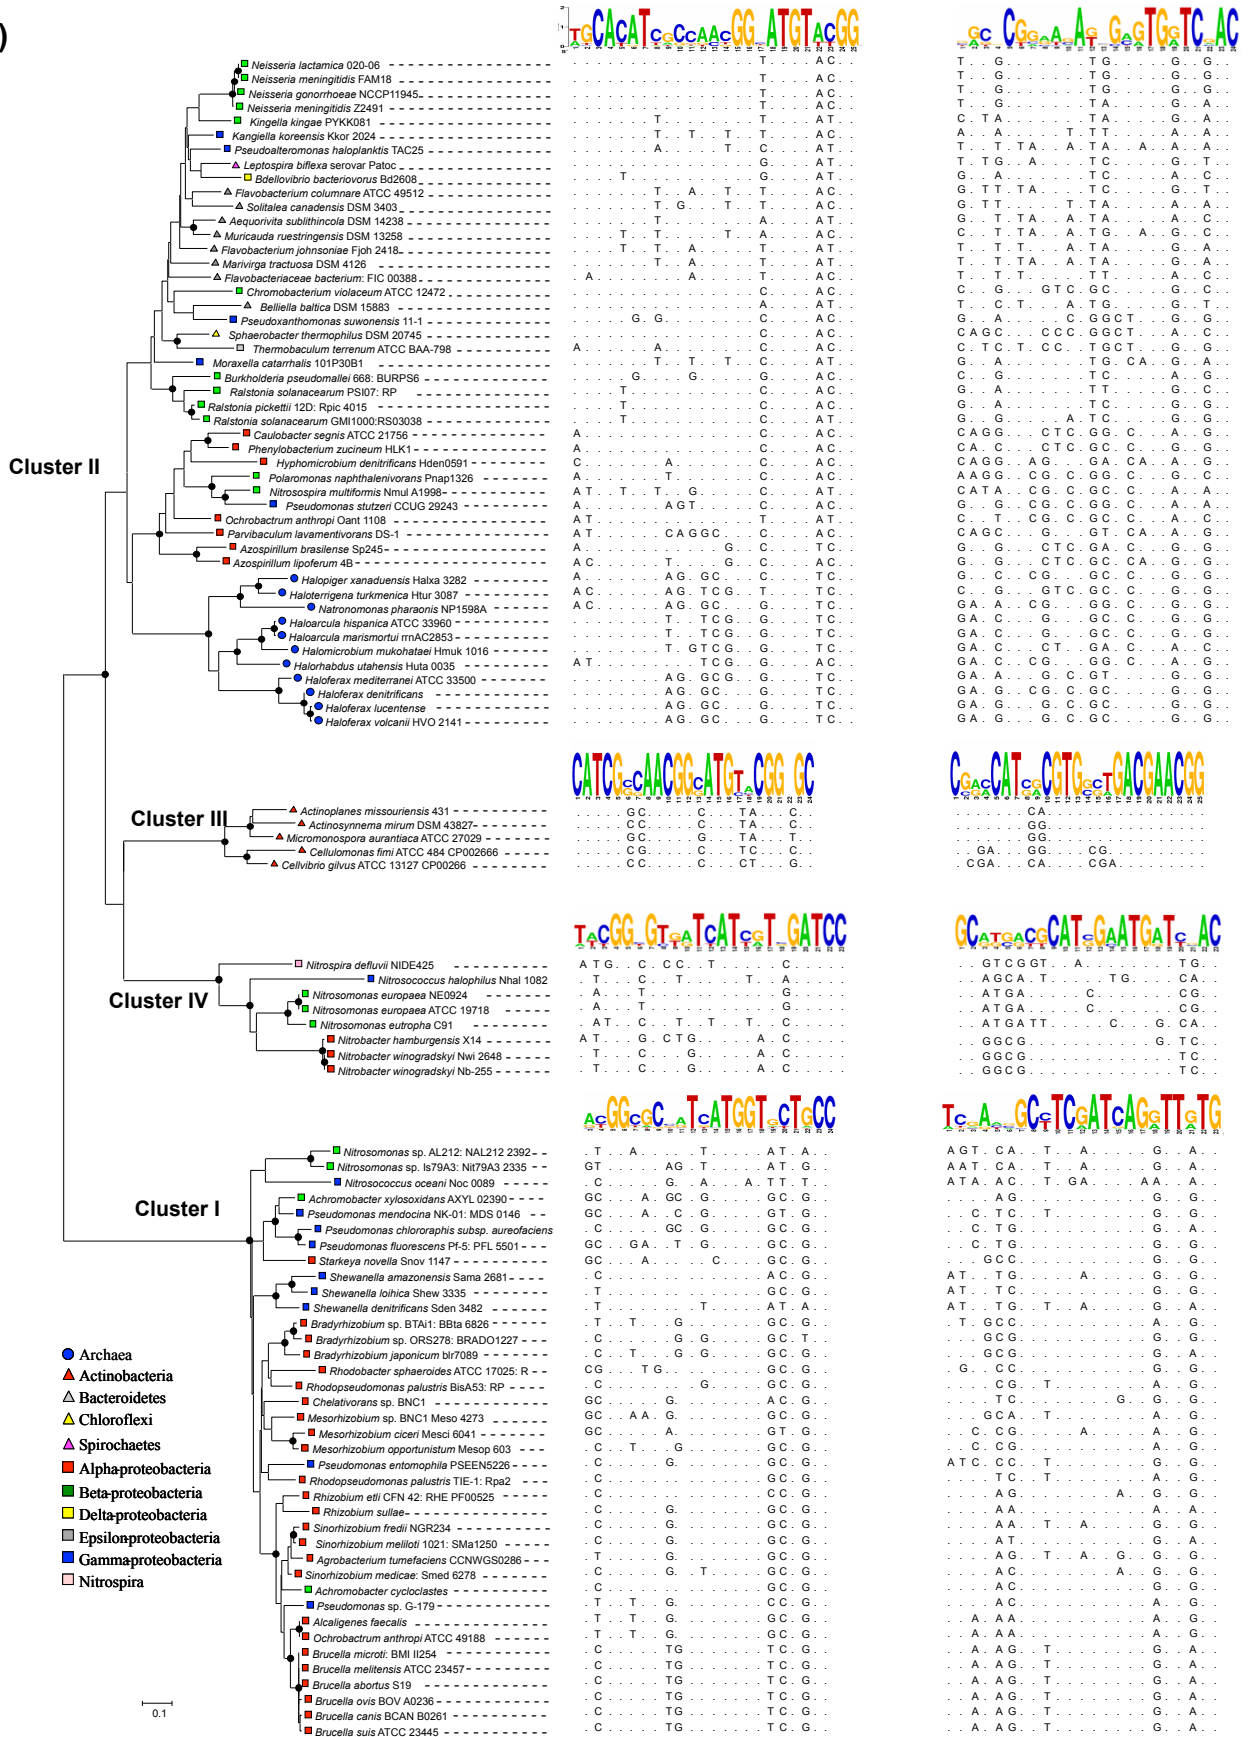

Figure S2, Wei et al.

(b)

- △ Bacteroidetes
- ▲ Candidate division NC10
- ▲ Planctomycetes
- Alpha-proteobacteria
- Beta-proteobacteria
- Epsilon-proteobacteria
- Gamma-proteobacteria

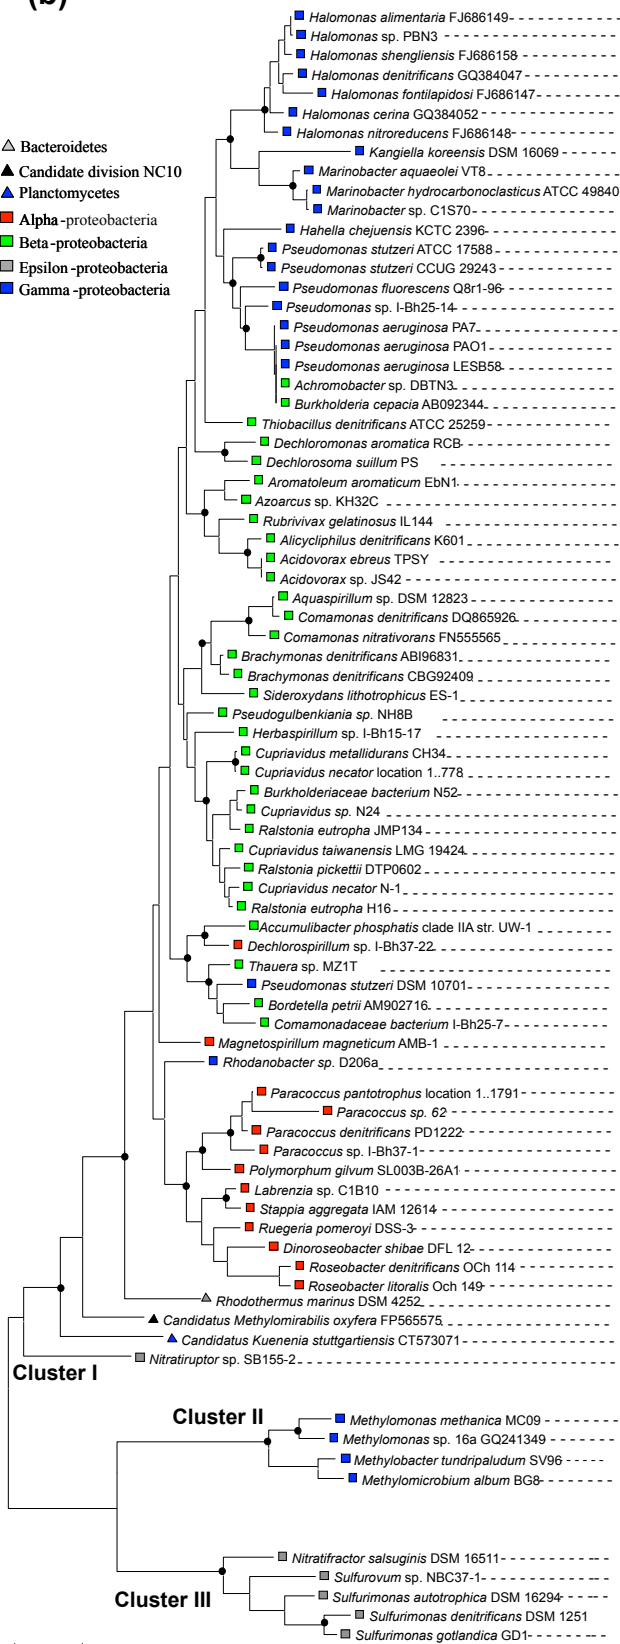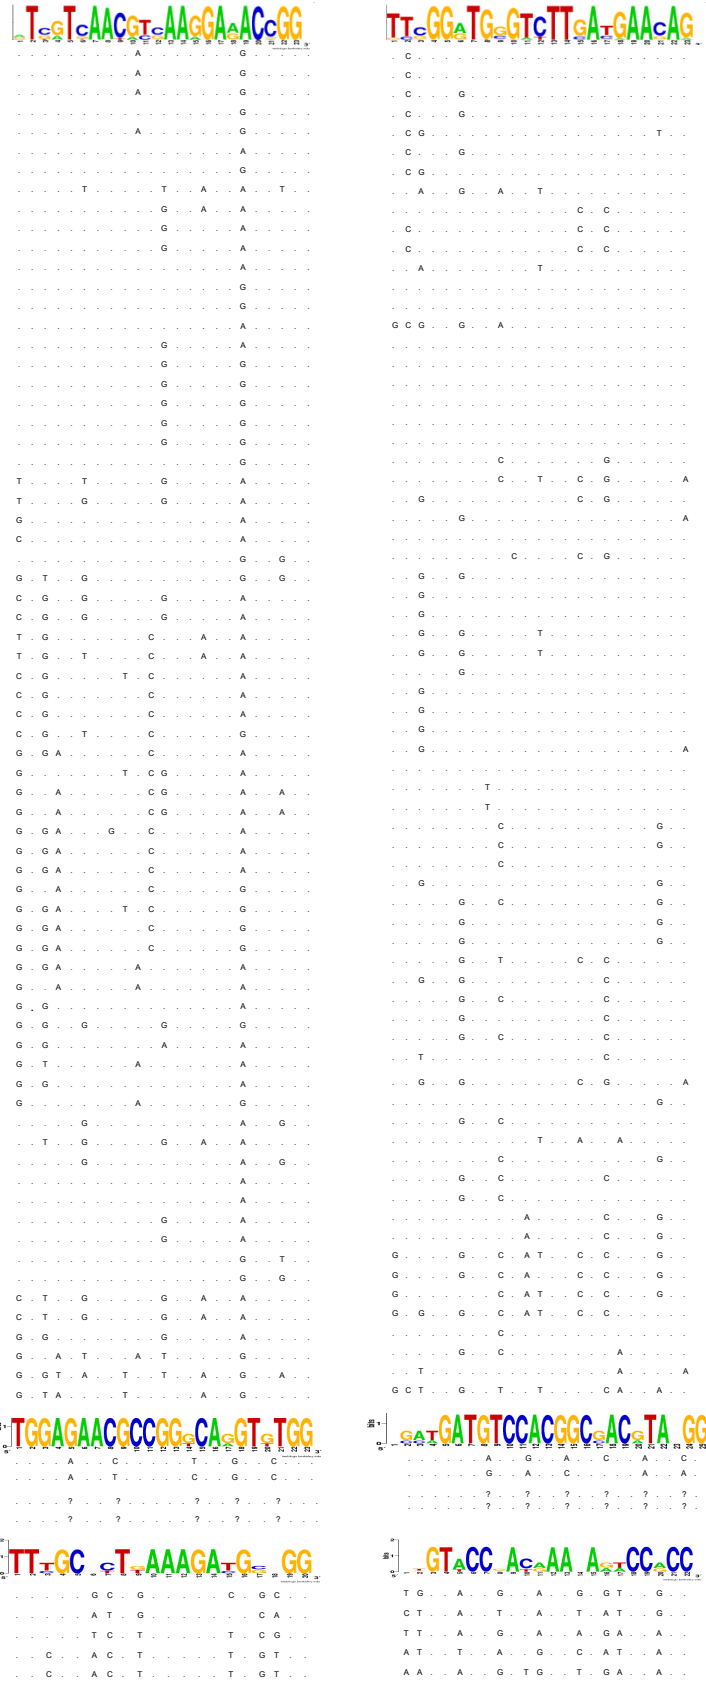

Figure S2, Wei et al.

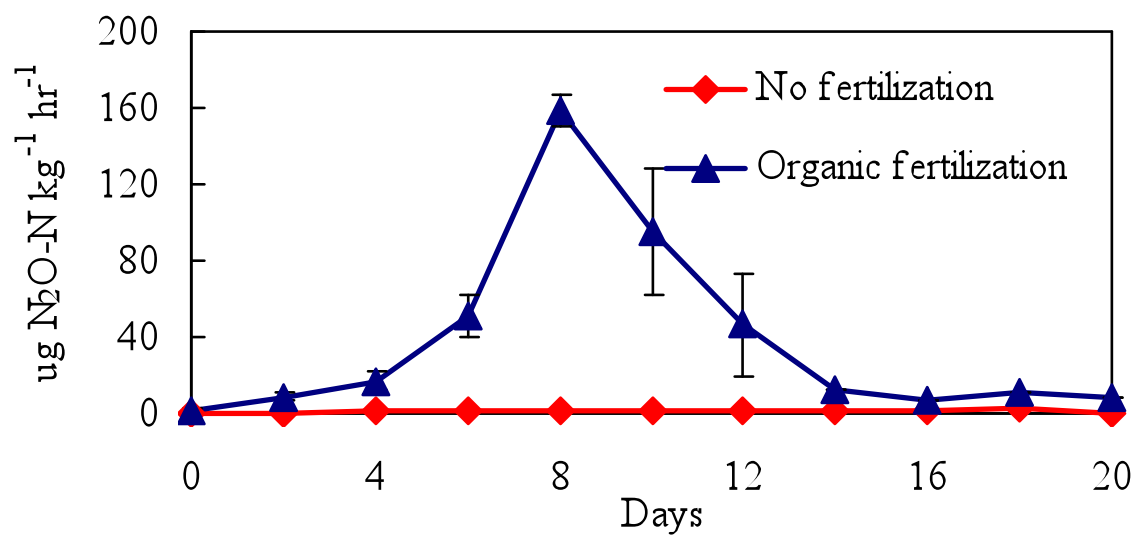

Figure S3, Wei et al.



(a)

- Archaea
- ▲ Actinobacteria
- △ Bacteroidetes
- ▲ Chloroflexi
- ▲ Spirochaetes
- Alpha-proteobacteria
- Beta-proteobacteria
- Delta-proteobacteria
- Epsilon-proteobacteria
- Gamma-proteobacteria
- Nitrospira

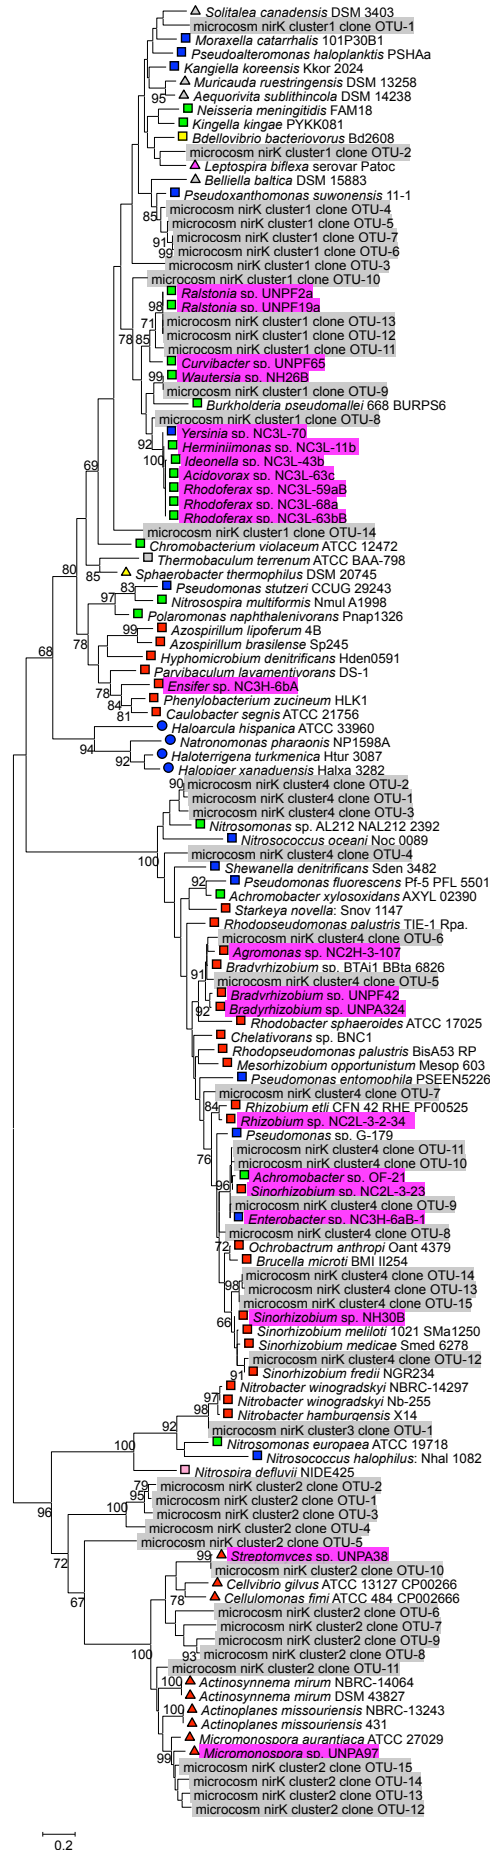

Cluster II

Cluster I

Cluster IV

Cluster III

Figure S4, Wei et al.



(b)

- △ Bacteroidetes
- ▲ Candidate division NC10
- ▲ Planctomycetes
- Alpha -proteobacteria
- Beta -proteobacteria
- Epsilon -proteobacteria
- Gamma -proteobacteria

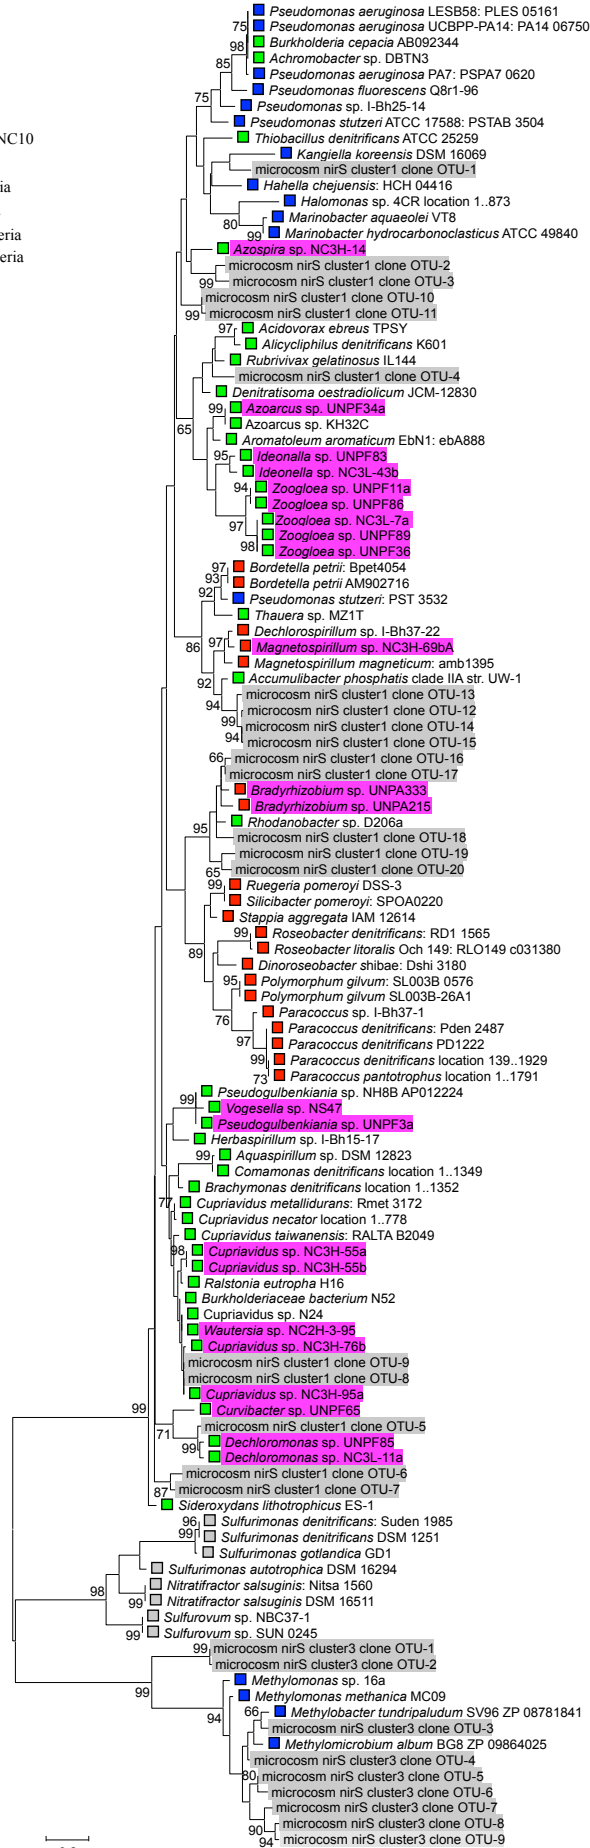

Cluster I

Cluster III

Cluster II

Figure S4 Wei et al.
